# Supplementary material for: Suppressed decomposition of organometal halide perovskites by impermeable electron-extraction layers in inverted solar cells
Source: PubMed Central journal article supplement (PMC5336555; doi:10.1038/ncomms13938), 2017-01-09
Supplement: ncomms13938-s1.pdf [file ncomms13938-s1.pdf]

## Supplementary Information

1  
2  
3  
4  
5  
6  
7  
8  
9  
10  
11  
12  
13  
14  
15  
16  
17  
18  
19  
20  
21  
22  
23  
24  
25

**Supplementary Fig. 1** studies the ALD growth of the SnO<sub>x</sub> layer on top of AZO, which has either been derived from an ALD process, and can therefore be considered as free of pinholes, or on top of an AZO layer prepared from a nanoparticle dispersion, where some porosity cannot be avoided. Details of the growth of AZO by ALD have been reported earlier.<sup>1</sup> The conformal nature of the ALD process is expected to yield some growth of SnO<sub>x</sub> inside the pores of the AZO layer. To analyze and quantify this effect, we performed Rutherford backscattering (RBS) measurements on the two samples shown in **Supplementary Fig. 1**. To this end, we have deposited nominally 20 nm (166 ALD cycles) of SnO<sub>x</sub> in one ALD process on top of both AZO layers. From the RBS spectra attributed to Sn, we are able to determine the number of Sn atoms per area, which is indicative of the amount of SnO<sub>x</sub> actually deposited. Interestingly, for the SnO<sub>x</sub> on top of the pin-hole-free ALD-AZO we measured  $(44.5 \pm 0.2) \times 10^{15}$  Sn-atoms per cm<sup>2</sup>, which is in excellent agreement to earlier RBS measurements of layers with a thickness of 20 nm (determined by stylus profilometry). On the contrary, for the SnO<sub>x</sub> on top of the NP-AZO layer we found  $(72.2 \pm 0.9) \times 10^{15}$  Sn-atoms per cm<sup>2</sup>, which is a factor of 1.62 higher than for the non-porous substrate. This result clearly supports the hypothesis of the ALD growth of the SnO<sub>x</sub> partially inside the pores of the nanoparticle derived AZO layer, which increases the total amount of SnO<sub>x</sub> deposited.

Moreover, the shoulder in the RBS spectrum of the Sn in case the SnO<sub>x</sub> layer has been grown on top of the AZO (NP) layer, is a direct result of a greater spatial variation of the Sn atoms in growth direction compared to the case where the SnO<sub>x</sub> layer has been grown on top of the AZO (ALD). This spatial variation originates from the infiltration of the SnO<sub>x</sub> into the porous AZO (NP) layer.

$44.5 \times 10^{15}$  Sn-atoms per  $\text{cm}^2$        $72.2 \times 10^{15}$  Sn-atoms per  $\text{cm}^2$

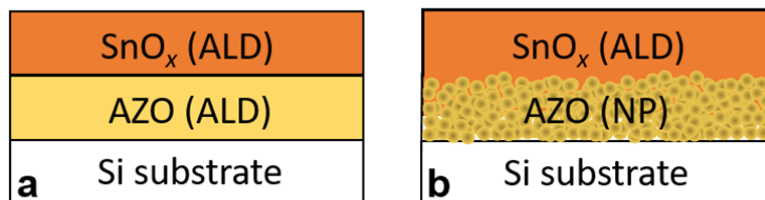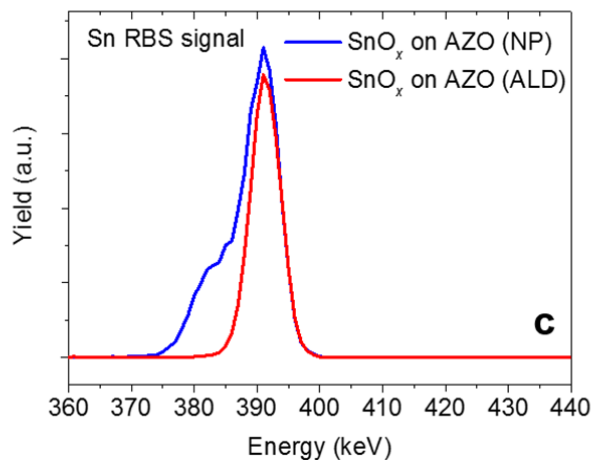

26

27

28 **Supplementary Figure 1: RBS study of the bi-layered AZO/SnO<sub>x</sub> EEL.** Layer  
29 sequence of samples used to study the ALD growth of the SnO<sub>x</sub> on top of an AZO layer  
30 grown by ALD, which is expected to have no pinholes (a), and on top of an AZO layer  
31 derived from a nanoparticle dispersion (b). The resulting RBS spectra attributed to Sn,  
32 which allow to determine the area density of Sn atoms (c).

33

34

35

36

37

38

39

40

41

42

43

44  
45  
46  
47

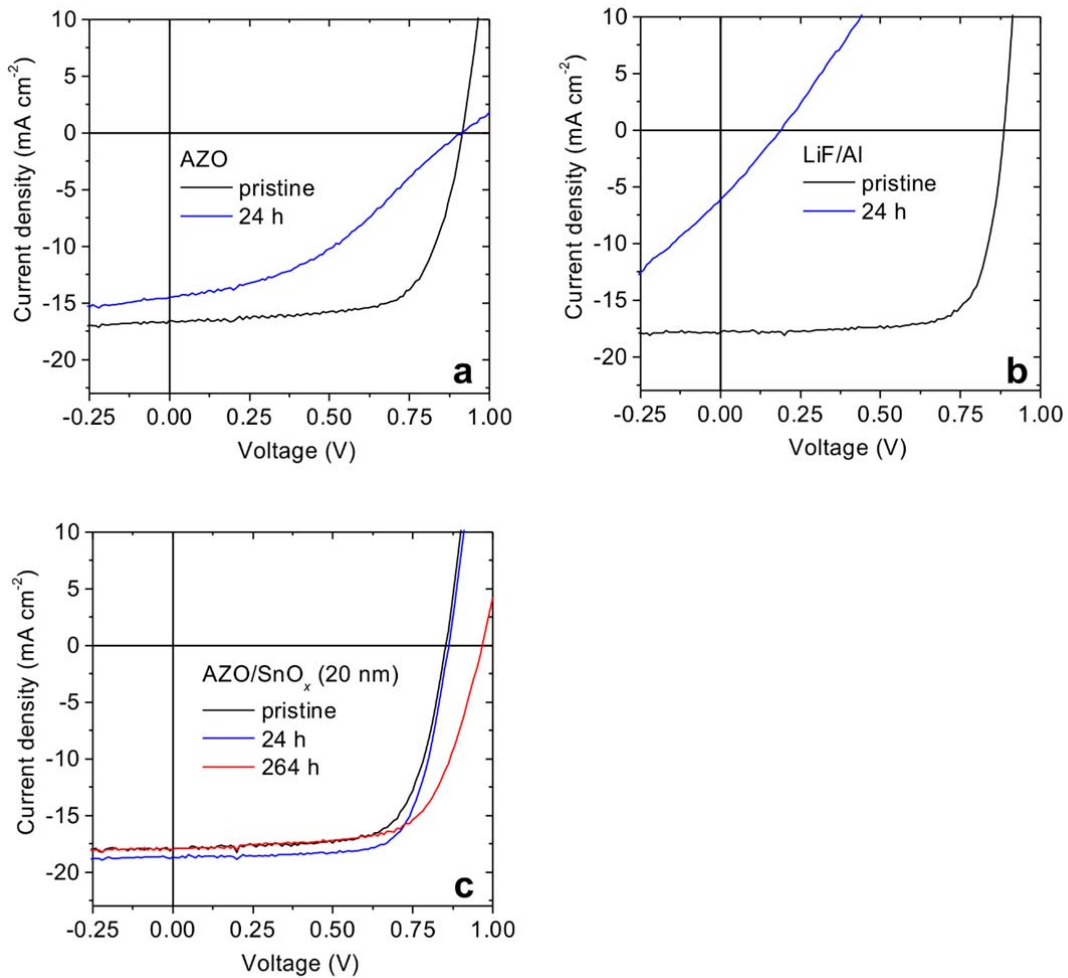

48

49 **Supplementary Figure 2:  $J/V$  characteristics of perovskite cells using different**  
50 **EELs in their pristine state and after some time in ambient air. AZO (a), LiF/Al (b)**  
51 **and AZO/SnO<sub>x</sub> (c). Note, here the SnO<sub>x</sub> layer was 20 nm thick.**

52

53 **Supplementary Fig. 2** shows the  $J/V$  characteristics of perovskite cells based on various  
54 electron extraction layers. The characteristics have been acquired in the pristine state  
55 and after storage in air for the time indicated. The extracted characteristics, i.e.  $V_{oc}$ ,  $FF$ ,  
56  $J_{sc}$ ,  $PCE$ , are discussed in the main manuscript (**Fig. 2**). In some batches of the  
57 perovskite, there is an increase of  $V_{oc}$  on a time scale of several tens of hours. This is  
58 only observed in the AZO/SnO<sub>x</sub> samples, as the LiF/Al and the AZO cells already undergo  
59 strong degradation on the same time scale. The increase of the  $V_{oc}$  on such a long time

60 scale may be associated with intrinsic changes of the defect structure in the perovskite,  
61 which is beyond the scope of the present work.

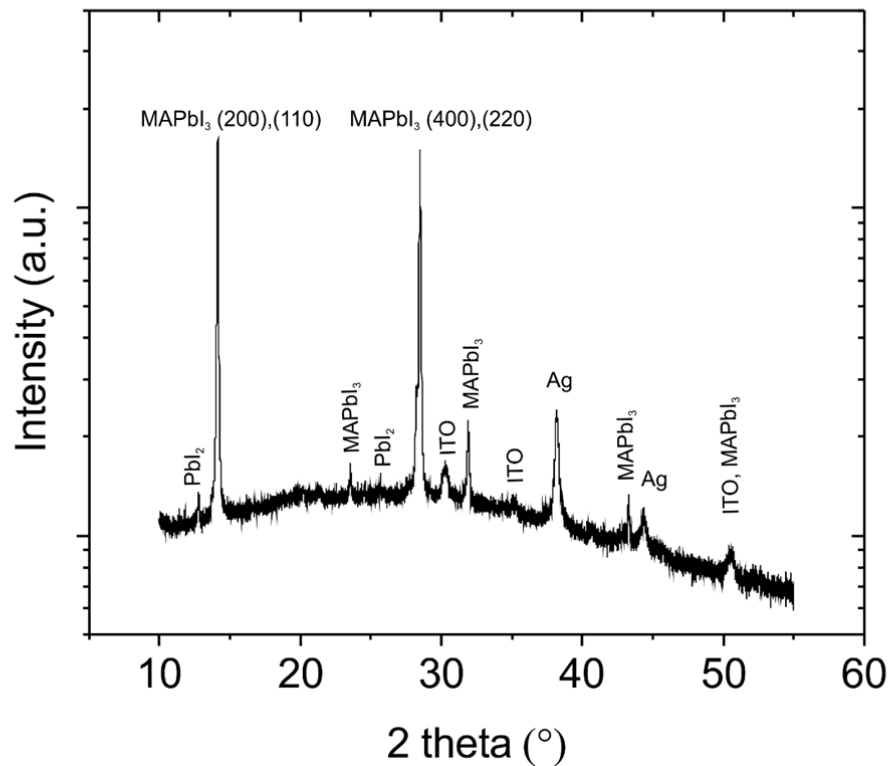

62

63

64 **Supplementary Figure 3: Logarithmic representation of the XRD**  
65 **spectrum of a fresh perovskite cell based on AZO as EEL with an**  
66 **assignment of the peaks to layers in the device.** The peak positions of  
67 MAPbI<sub>3</sub> (ref. 2), Pbl<sub>2</sub> (ref. 3), ITO (ref. 4), and Ag (ref. 5), were taken from  
68 the respective references.

69

70 The survey XPS spectra for cells based on AZO, SnO<sub>x</sub> and bi-layered AZO/SnO<sub>x</sub> EELs, are  
71 shown in **Supplementary Fig. 4**. As expected, no signal due to the perovskite (e.g.  
72 Pb4d) can be detected, because the perovskite in these samples is covered by  
73 PCBM/AZO/Ag, or PCBM/SnO<sub>x</sub>/Ag, or PCBM/AZO/SnO<sub>x</sub>, respectively. Note, the position  
74 where the Pb4f signals would be located is overlaid by Zn3s and Sn4s signals as indicated  
75 in the figure, thus we refer to the Pb4d signal.

76

77

78  
79  
80

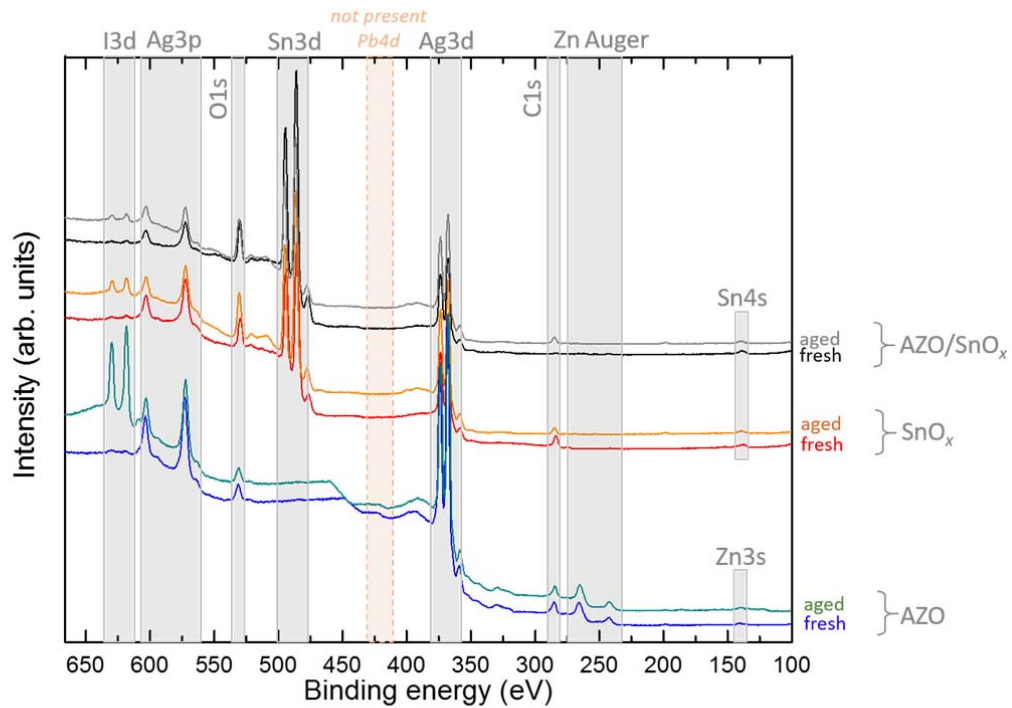

81  
82  
83  
84  
85  
86  
87  
88  
89  
90  
91  
92  
93

**Supplementary Figure 4: Survey photoemission spectra.** Spectra for cells based on AZO (fresh sample (blue), aged sample (green)), SnO<sub>x</sub> (fresh sample (red), aged sample (orange)) and bi-layered AZO/SnO<sub>x</sub> (fresh sample (black), aged sample (grey)) EELs are shown, respectively. Samples were either fresh or aged for two days in air, respectively. The top Ag layer was only about 10 nm to see the metal-oxide underneath. The spectral region, where the signals due to electrons resulting from the respective atomic orbitals are found or expected are shaded in grey and labelled with the element and atomic orbital. The spectral region where the Pb4d signal would be expected is shaded on orange.

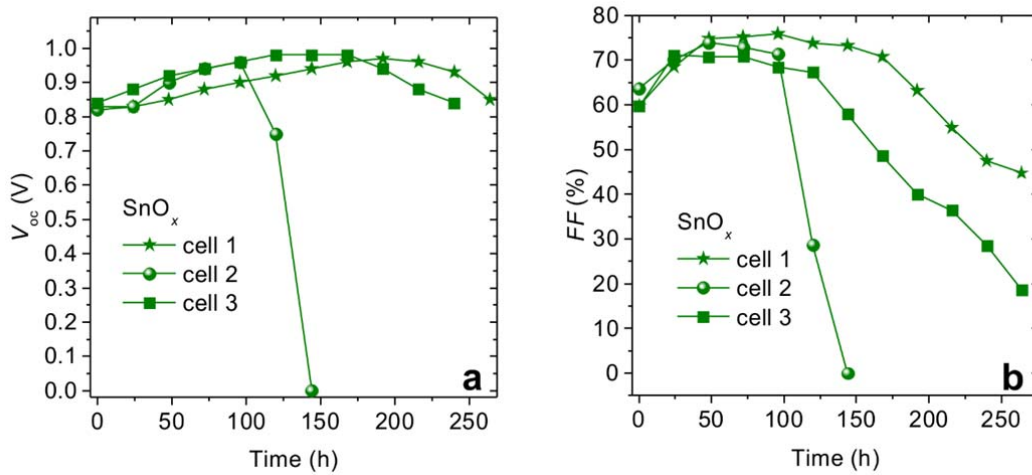

95

96 **Supplementary Figure 5: Stability of devices based on only  $\text{SnO}_x$  as**  
 97 **EEL.** (a) Characteristics of perovskite cells with 20 nm of ALD  $\text{SnO}_x$  as EEL  
 98 upon storage in ambient air (at 22°C, 60%rH).  $V_{oc}$  vs. time (a) and  $FF$  vs.  
 99 time (b).

100 The barrier properties of the AZO and AZO/ $\text{SnO}_x$  EELs have been studied by using Ca-  
 101 corrosion test. Detail of this test have been describe previously.<sup>6</sup> Specifically, we have  
 102 used a setup as shown in **Supplementary Fig. 5a**. The substrate was a PET/ITO foil,  
 103 which has an intrinsic water vapor transmission rate of  $3 \times 10^{-2} \text{ gm}^{-2}\text{day}^{-1}$ . On top of this  
 104 substrate we have deposited the PCBM layer and the EEL in an identical way as in case of  
 105 the solar cells. Subsequently, an array of Ca dots has been thermally evaporated  
 106 (thickness 100 nm). The top-side of this stack has been encapsulated by a 200 nm thick  
 107  $\text{Al}_2\text{O}_3$  gas diffusion barrier using ALD. The WVTR of the  $\text{Al}_2\text{O}_3$  top-encapsulation is  
 108 expected to be on the order of  $10^{-6} \text{ gm}^{-2}\text{day}^{-1}$  (ref. 7). Thus only the water ingress from  
 109 the bottom side through the substrate and the PCBM/EEL will be relevant for the  
 110 corrosion of the Ca. While the Ca appears metallic in the pristine samples, the corrosion  
 111 due to moisture will render the Ca transparent **Supplementary Fig. 5b**. Obviously, in  
 112 the case of AZO the degradation of the Ca pads is substantially faster, as after 36h in air  
 113 almost all the pads have vanished. Therefore the WVTR of the AZO layer does not  
 114 provide any significant barrier against the ingress of moisture. On the contrary, in case of  
 115 the AZO/ $\text{SnO}_x$  EEL the Ca pads appear far less corroded. This corroborates the barrier  
 116 functionality of the ALD grown  $\text{SnO}_x$  layer on top of the AZO. It has to be noted that  
 117 some statistical failure may be due to particle defects that may void the effectivity of the  
 118 top encapsulation layer.<sup>8</sup>

119

120

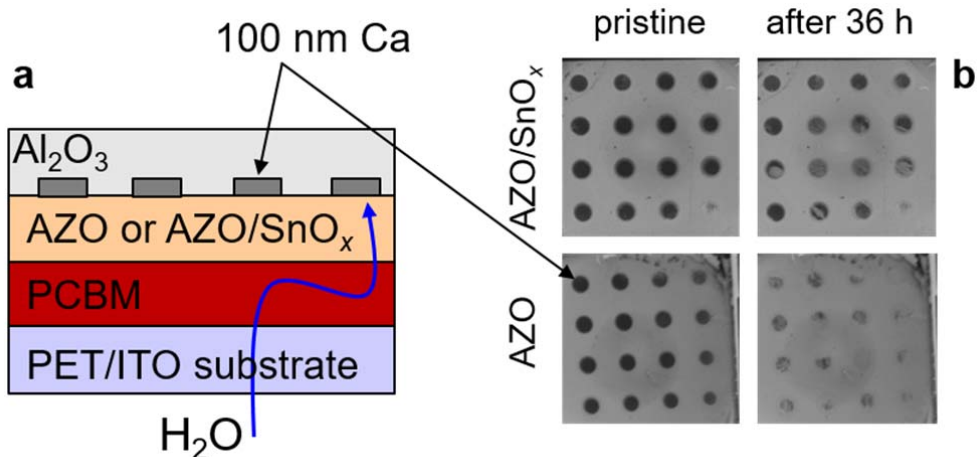

121

122 **Supplementary Figure 6: Permeation barrier functionality of AZO and**  
 123 **AZO/SnO<sub>x</sub>.** (a) Schematic of the Ca-test used to study the permeation  
 124 barrier properties of the EEL. As substrate an ITO coated PET foil has been  
 125 used ( $WVTR = 3 \times 10^{-2} \text{ gm}^{-2}\text{day}^{-1}$ ). Integrity of the Ca-dots in case of the AZO  
 126 and AZO/SnO<sub>x</sub> samples in their pristine state and after exposure to ambient  
 127 air for 36 h (b).

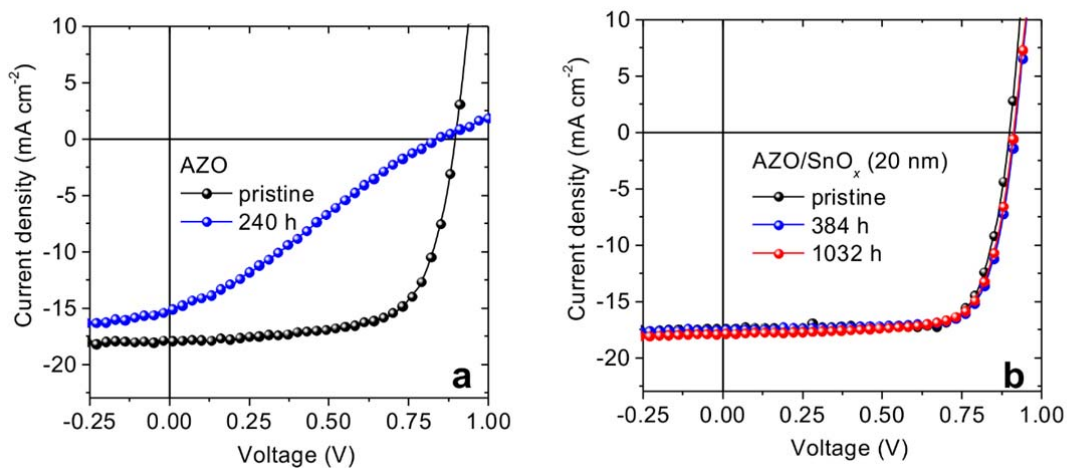

128

129 **Supplementary Figure 7:  $J/V$  characteristics of perovskite cells using different**  
 130 **EELs in their pristine state and after aging at 60°C in inert N<sub>2</sub> atmosphere.  $J/V$**   
 131 **characteristics of perovskite cells using AZO (a) and AZO/SnO<sub>x</sub> (b) as EEL.**  
 132

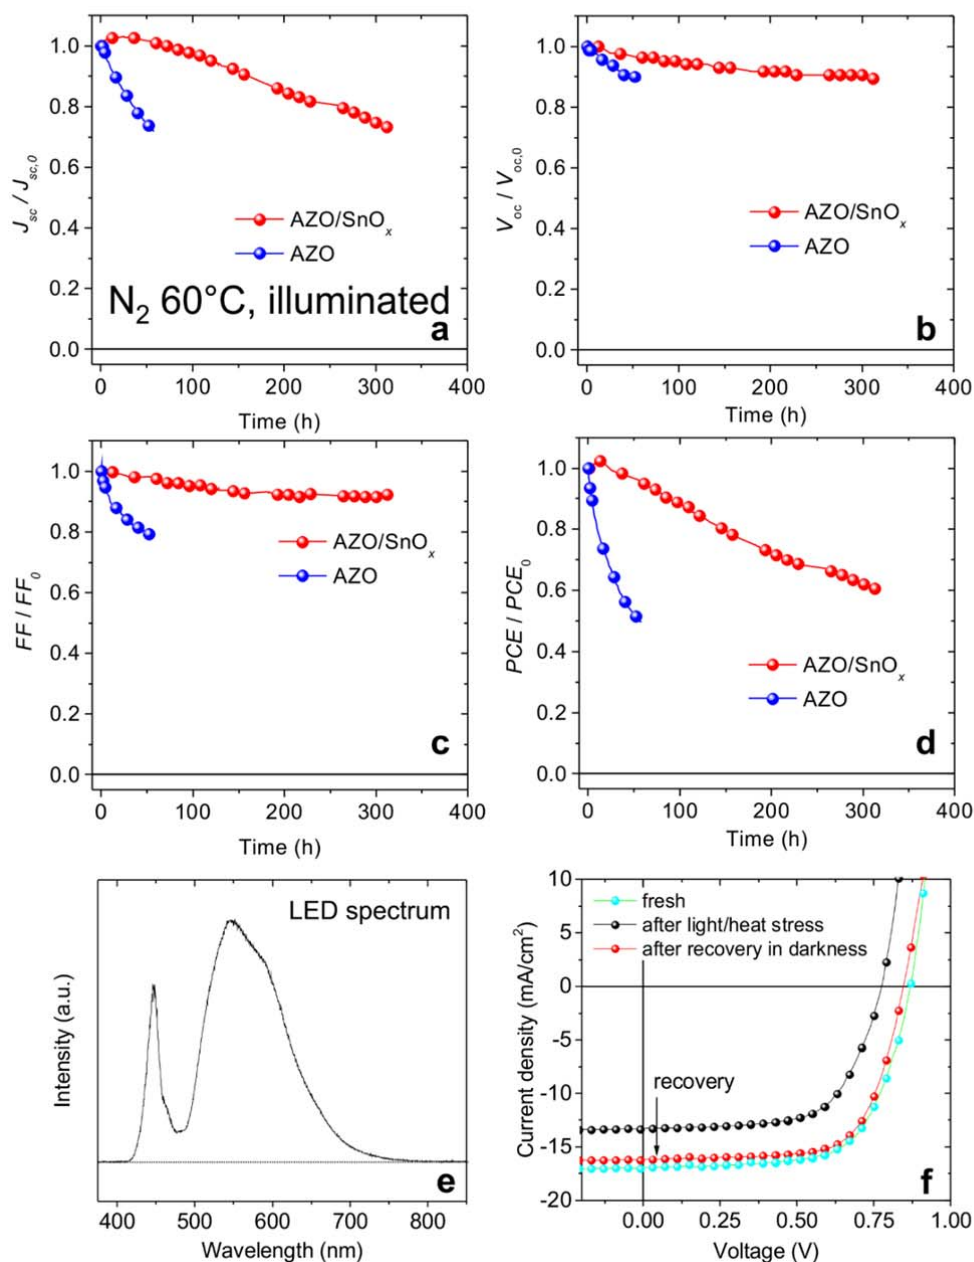

133  
 134  
 135  
 136  
 137  
 138  
 139  
 140  
 141  
 142

**Supplementary Figure 8: Characteristics of inverted perovskite cells with varied cathode electron extraction assemblies (AZO/SnO<sub>x</sub>/Ag, AZO/Ag) vs. time of storage at 60°C in nitrogen atmosphere and simultaneous illumination.** A white LED has been used for illumination to achieve the same  $J_{sc}$  as under the solar simulator.  $J_{sc}$  (a),  $V_{oc}$  (b),  $FF$  (c), and  $PCE$  (d).  $J_{sc,0}$ ,  $V_{oc,0}$ ,  $FF_0$ , and  $PCE_0$  are the characteristics of the cells before stressing. In this set of samples, the thickness of the ALD SnO<sub>x</sub> layer was 20 nm and that of the Ag electrode was 100 nm. The characteristics have been determined from the  $J/V$  measurements in reverse direction. Spectrum of the white LED used for the light-soaking stress test under concomitant heating (e).  $J/V$  characteristics



143 of an AZO/SnO<sub>x</sub>/Ag cell, non-stressed (fresh), stressed for 300 hours (light/heat), and  
144 subsequently recovered in in darkness at room temperature for nine days (in the glove  
145 box).

146

#### 147 **Supplementary References**

148

- 149 1. Behrendt A, *et al.* Highly Robust Transparent and Conductive Gas Diffusion  
150 Barriers Based on Tin Oxide. *Adv Mater* **27**, 5961-5967 (2015).  
151
- 152 2. Safdari M, Fischer A, Xu B, Kloo L, Gardner JM. Structure and function  
153 relationships in alkylammonium lead(II) iodide solar cells. *Journal of Materials*  
154 *Chemistry A* **3**, 9201-9207 (2015).  
155
- 156 3. Zhou Y, *et al.* Growth control of compact CH<sub>3</sub>NH<sub>3</sub>PbI<sub>3</sub> thin films via enhanced  
157 solid-state precursor reaction for efficient planar perovskite solar cells. *Journal of*  
158 *Materials Chemistry A* **3**, 9249-9256 (2015).  
159
- 160 4. Sunde TOL, *et al.* Transparent and conducting ITO thin films by spin coating of an  
161 aqueous precursor solution. *J Mater Chem* **22**, 15740-15749 (2012).  
162
- 163 5. Kato Y, Ono LK, Lee MV, Wang S, Raga SR, Qi Y. Silver Iodide Formation in Methyl  
164 Ammonium Lead Iodide Perovskite Solar Cells with Silver Top Electrodes.  
165 *Advanced Materials Interfaces* **2**, 1500195 (2015).  
166
- 167 6. Hoffmann L, Theirich D, Hasselmann T, Raupke A, Schlamm D, Riedl T. Gas  
168 permeation barriers deposited by atmospheric pressure plasma enhanced atomic  
169 layer deposition. *J Vac Sci Technol A* **34**, 01A114 (2016).  
170
- 171 7. Meyer J, *et al.* Al<sub>2</sub>O<sub>3</sub>/ZrO<sub>2</sub> Nanolaminates as Ultrahigh Gas-Diffusion Barriers-A  
172 Strategy for Reliable Encapsulation of Organic Electronics. *Adv Mater* **21**, 1845-  
173 1849 (2009).  
174
- 175 8. Behrendt A, Meyer J, van de Weijer P, Gahlmann T, Heiderhoff R, Riedl T. Stress  
176 Management in Thin-Film Gas-Permeation Barriers. *Acs Appl Mater Inter* **8**, 4056-  
177 4061 (2016).  
178
